# Supplementary material for: The burden of nosocomial covid-19: results from the Wales multi-centre retrospective observational study of 2518 hospitalised adults
Source: bioRxiv or medRxiv preprint supplement (doi:10.1101/2021.01.18.21249433), 2021-03-19
Supplement: Supplementary file [file media-1.pdf]

**Supplementary material to accompany: The burden of nosocomial covid-19: results from the Wales multi-centre retrospective observational study of 2518 hospitalised adults.**

|                                                                                                                                                                                                         |          |
|---------------------------------------------------------------------------------------------------------------------------------------------------------------------------------------------------------|----------|
| <b>Supplementary Table 1: List of participating centres .....</b>                                                                                                                                       | <b>2</b> |
| <b>Supplementary Table 2: Commonly used case definitions for probable covid-19 origin .....</b>                                                                                                         | <b>3</b> |
| <b>Supplementary Figure 1: Study flowchart .....</b>                                                                                                                                                    | <b>4</b> |
| <b>Supplementary Table 3: Admission characteristics stratified by age and sex .....</b>                                                                                                                 | <b>5</b> |
| <b>Supplementary Table 4: Effect of varying diagnostic cut-off on burden of nosocomial infection .....</b>                                                                                              | <b>6</b> |
| <b>Supplementary Figure 2: Kaplan Meier survival plot of nosocomial versus community infection of covid-19 patients.....</b>                                                                            | <b>7</b> |
| <b>Supplementary Table 5: Comparison of community-acquired and nosocomial-acquired covid-19 patient characteristics, based on a diagnostic case testing threshold of 48 hours after admission .....</b> | <b>8</b> |
| <b>Supplementary Table 6: Monthly prevalence of nosocomial infection diagnosis .....</b>                                                                                                                | <b>9</b> |

Supplementary Table 1: List of participating centres

|                               |                                                                                                         |
|-------------------------------|---------------------------------------------------------------------------------------------------------|
|                               |                                                                                                         |
| Aneurin Bevan Health Board    | Nevill Hall Hospital, Royal Gwent Hospital and Ysbyty Ystrad Fawr.                                      |
| Betsi Cadwalladr Health Board | Glan Clwyd Hospital, Wrexham Maelor Hospital and Ysbyty Gwynedd (Bangor).                               |
| Cardiff and Vale Health Board | University Hospital Llandough and University Hospital of Wales.                                         |
| Cwm Taf Health Board          | Prince Charles Hospital, Princess of Wales Hospital and Royal Glamorgan Hospital.                       |
| Hywel Dda Health Board        | Bronglais Hospital, Glangwili General Hospital, Prince Phillip Hospital and Withybush General Hospital. |
| Swansea Bay Health Board      | Morrison Hospital, Singleton Hospital and Neath Port Talbot Hospital.                                   |

All hospitals delivered urgent and emergency care to patients diagnosed with covid-19.

Supplementary Table 2: Commonly used case definitions for probable covid-19 origin

|                                       | <b>Case definition</b>                                                                                                                                 | <b>Probable covid-19 origin</b>     |
|---------------------------------------|--------------------------------------------------------------------------------------------------------------------------------------------------------|-------------------------------------|
| COPE study investigators <sup>1</sup> | Positive SARS-CoV-2 test taken prior to or within first 5 days of admission                                                                            | Community-acquired covid-19 (“CAC”) |
|                                       | Positive SARS-CoV-2 test taken between 5-14 days after admission                                                                                       | Probable Community-acquired         |
|                                       | Positive SARS-CoV-2 test taken more than 14 days after hospital admission<br><i>(patient required to remain an inpatient on date of swab sampling)</i> | Hospital-acquired (Nosocomial-“NC”) |
|                                       |                                                                                                                                                        |                                     |
| Public Health England                 | Positive SARS-CoV-2 test taken after 7 days of hospital admission                                                                                      | Probable Nosocomial covid-19        |
|                                       |                                                                                                                                                        |                                     |
| Public Health Wales                   | Positive SARS-CoV-2 test taken an no hospital admission within 28 days or within 2 days of hospital admission                                          | Community onset                     |
|                                       | Positive SARS-CoV-2 test taken more than 2 days and less than 8 days from hospital admission                                                           | Indeterminate hospital onset        |
|                                       | Positive SARS-CoV-2 test taken more than 7 days and less than 15 days from hospital admission                                                          | Probable hospital onset             |
|                                       | Positive SARS-CoV-2 test taken more 14 days from hospital admission                                                                                    | Definite hospital onset             |

<sup>1</sup> Carter B, Collins JT, Barlow-Pay F, et al. Nosocomial COVID-19 infection: examining the risk of mortality. The COPE-Nosocomial Study (COVID in Older PEople). *Journal of Hospital Infection* 2020; **106**(2): 376-84.

Supplementary Figure 1: Study flowchart

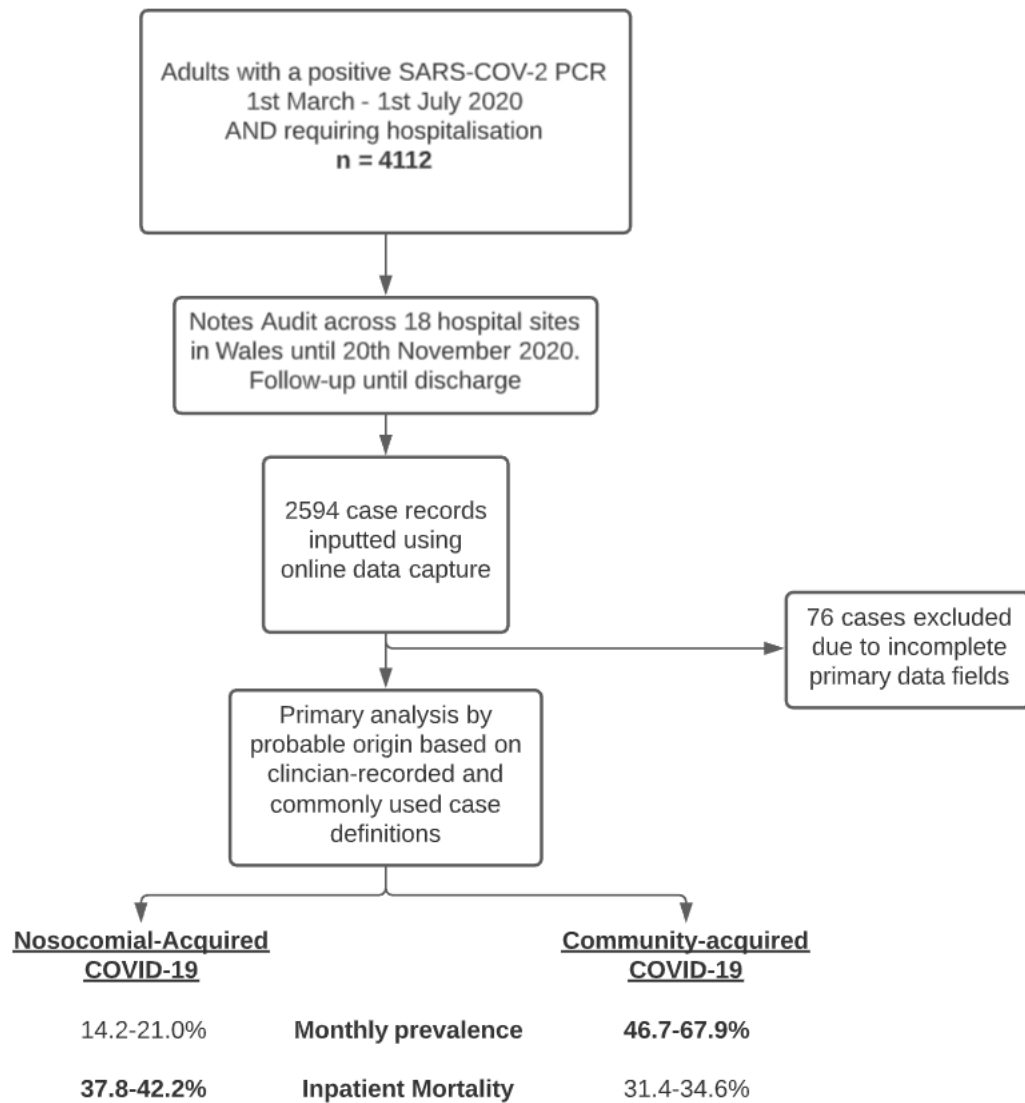

Supplementary Table 3: Admission characteristics stratified by age and sex

| <b>Age Group (years)</b> | <b>Female</b> | <b>% Female</b> | <b>Male</b> | <b>% Male</b> | <b>Total cases</b> | <b>% Total Cases</b> |
|--------------------------|---------------|-----------------|-------------|---------------|--------------------|----------------------|
| <b>18-44</b>             | 98            | 54.1            | 83          | 45.9          | 181                | 7.2%                 |
| <b>45-54</b>             | 106           | 46.1            | 124         | 53.9          | 230                | 9.1%                 |
| <b>55-64</b>             | 144           | 38.8            | 227         | 61.2          | 371                | 14.7%                |
| <b>65-74</b>             | 196           | 39.0            | 307         | 61.0          | 503                | 20.0%                |
| <b>75-84</b>             | 291           | 42.3            | 397         | 57.7          | 688                | 27.3%                |
| <b>≥85</b>               | 314           | 57.6            | 231         | 42.4          | 545                | 21.6%                |

Supplementary Table 4: Effect of varying diagnostic cut-off on burden of nosocomial infection

Sensitivity analysis to explore the effect of theoretical and current case definitions across the reported incubation period of SARS-CoV-2 virus. Diagnostic cut-off refers to the number of days elapsed between admission and a positive SARS-CoV-2 test being taken. An interval greater than this threshold is used to define nosocomial covid-19, and an interval less than the threshold

| DIAGNOSTIC CUT-OFF | PROBABLE ORIGIN | DIED | DISCHARGED | TOTAL | MORTALITY (%) |
|--------------------|-----------------|------|------------|-------|---------------|
| >2                 | Nosocomial      | 409  | 594        | 1003  | 40.78         |
| ≤2                 | Community       | 478  | 1037       | 1515  | 31.55         |
| >3                 | Nosocomial      | 392  | 557        | 949   | 41.31         |
| ≤3                 | Community       | 495  | 1074       | 1569  | 31.55         |
| >4                 | Nosocomial      | 378  | 518        | 896   | 42.19         |
| ≤4                 | Community       | 509  | 1113       | 1622  | 31.38         |
| >5                 | Nosocomial      | 342  | 488        | 830   | 41.20         |
| ≤5                 | Community       | 545  | 1143       | 1688  | 32.29         |
| >6                 | Nosocomial      | 318  | 453        | 771   | 41.25         |
| ≤6                 | Community       | 569  | 1178       | 1747  | 32.57         |
| >7                 | Nosocomial      | 301  | 426        | 727   | 41.40         |
| ≤7                 | Community       | 586  | 1205       | 1791  | 32.72         |
| >8                 | Nosocomial      | 280  | 394        | 674   | 41.54         |
| ≤8                 | Community       | 607  | 1237       | 1844  | 32.92         |
| >9                 | Nosocomial      | 252  | 368        | 620   | 40.65         |
| ≤9                 | Community       | 635  | 1263       | 1898  | 33.46         |
| >10                | Nosocomial      | 229  | 347        | 576   | 39.76         |
| ≤10                | Community       | 658  | 1284       | 1942  | 33.88         |
| >11                | Nosocomial      | 208  | 329        | 537   | 38.73         |
| ≤11                | Community       | 679  | 1302       | 1981  | 34.28         |
| >12                | Nosocomial      | 187  | 307        | 494   | 37.85         |
| ≤12                | Community       | 700  | 1324       | 2024  | 34.58         |
| >13                | Nosocomial      | 174  | 283        | 457   | 38.07         |
| ≤13                | Community       | 713  | 1348       | 2061  | 34.59         |
| >14                | Nosocomial      | 169  | 264        | 433   | 39.03         |
| ≤14                | Community       | 718  | 1367       | 2085  | 34.44         |
| >15                | Nosocomial      | 165  | 258        | 423   | 39.01         |
| ≤15                | Community       | 722  | 1373       | 2095  | 34.46         |

community-acquired covid -19.

Supplementary Figure 2: Kaplan Meier survival plot of nosocomial versus community infection of covid-19 patients.

Sensitivity analysis to investigate the performance of the commonly-used Kaplan Meier Survival Curve to compares survival in Community-acquired (light grey) and Nosocomial-acquired covid-19 infection (dark grey). Survival curves are compared using the log-rank test with 95% confidence interval indicated by shading. Here, censoring of patients into the absorbing state of “discharge” at a disproportionate rate within the Community-acquired covid-19 group leads to inverse interpretation to that seen in competing risks analysis.

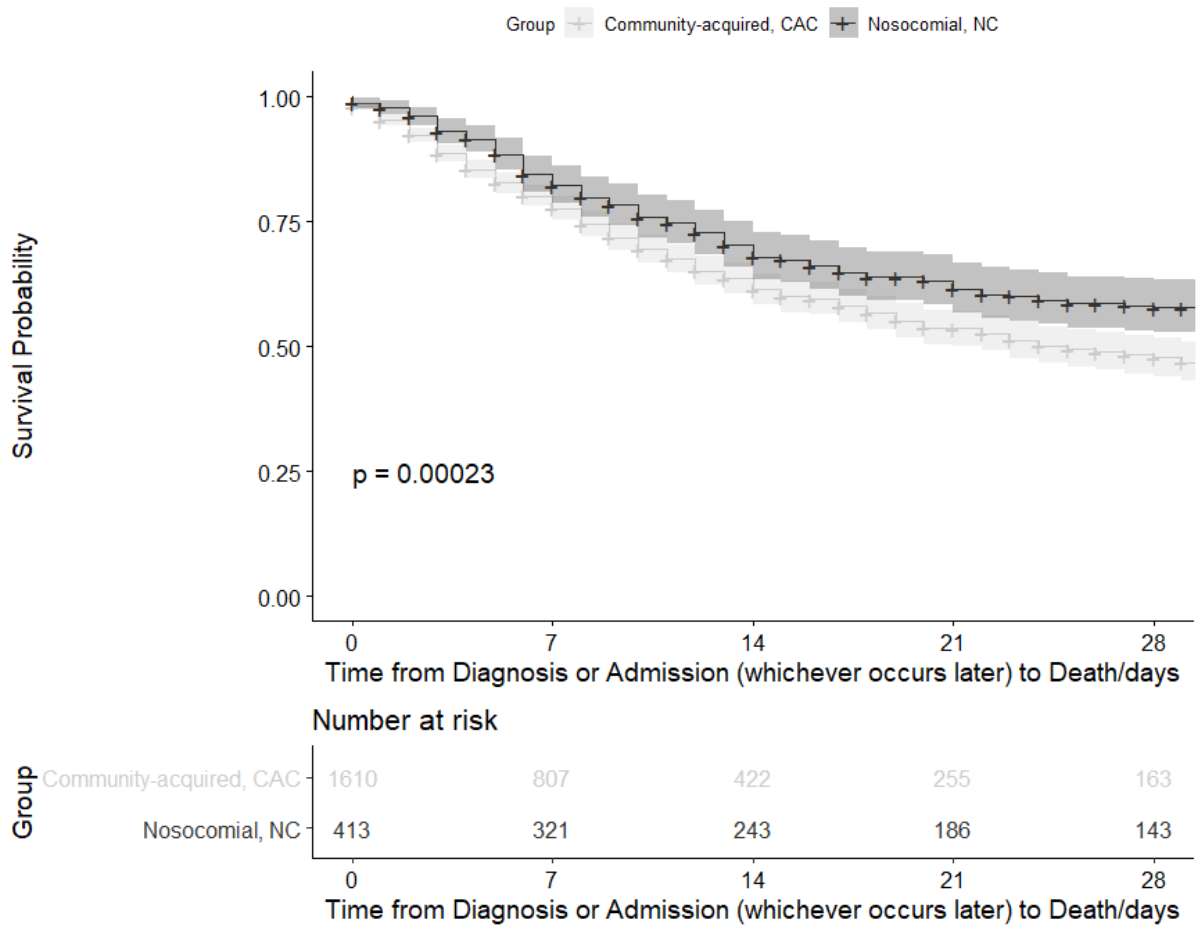

Supplementary Table 5: Comparison of community-acquired and nosocomial-acquired covid-19 patient characteristics, based on a diagnostic case testing threshold of 48 hours after admission

| <b>Variable, median (IQR)</b>       | <b>Diagnosed within first 48 hours of admission<br/>“Community-Acquired”</b> | <b>Diagnosed after first 48 hours of admission<br/>“Nosocomial-Acquired”</b> | <b>Univariate Significance</b> |
|-------------------------------------|------------------------------------------------------------------------------|------------------------------------------------------------------------------|--------------------------------|
| N                                   | 1515 (60.2%)                                                                 | 1003 (39.8%)                                                                 | -                              |
| Female (n, %)                       | 663(43.8%)                                                                   | 486(48.5%)                                                                   | 0.0394                         |
| Age, years                          | 69 (56-80)                                                                   | 79 (71-87)                                                                   | <0.0001                        |
| Total co-morbidities count          | 2.0 (1.0-4.0)                                                                | 3.0 (2.0-4.0)                                                                | <0.0001                        |
| Clinical Frailty Score              | 3 (2-6)<br><i>Data available in 864 cases (57%)</i>                          | 6 (4-7)<br><i>Data available in 445 cases (44%)</i>                          | <0.0001                        |
| Welsh index of multiple deprivation | 745 (372-1283)<br><i>Data available in 1442 cases (95%)</i>                  | 775 (403-1323)<br><i>Data available in 952 cases (95%)</i>                   | 0.180                          |



Supplementary Table 6: Monthly prevalence of nosocomial infection diagnosis

| Month (2020) | Total recorded cases | COPE/ Public Health Wales case definition* | Clinician-recoded diagnosis |
|--------------|----------------------|--------------------------------------------|-----------------------------|
|              |                      | 'Definite' nosocomial (%)                  | Hospital-acquired (%)       |
| March        | 681                  | 97 (14.2%)                                 | 118 (17.3%)                 |
| April        | 1353                 | 216 (16.0%)                                | 224 (16.6%)                 |
| May          | 347                  | 73 (21.0%)                                 | 67 (19.3%)                  |
| June         | 135                  | 25 (18.5%)                                 | 26 (19.3%)                  |

\*Defined by diagnostic PCR testing performed >14 days following hospital admission.
